# Supplementary material
Source: Springer Nature journal article supplement (https://www.springermedizin.de/resource/supplementary/12967_2013_1750_MOESM3_ESM.pdf/9575202)

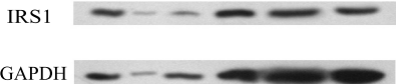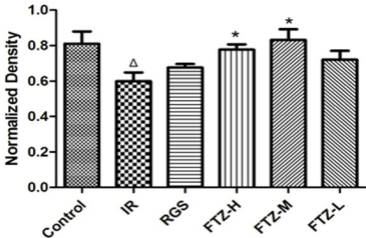

Supplement: MOESM3 [file 9575202]
